# Supplementary material for: Amine oxide surfactant-mediated synthesis of plate-based gold nanocrystals with tunable surface wrinkles and their applications in the ethylene glycol oxidation reaction
Source: Royal Society of Chemistry journal article supplement (doi:10.1039/d4ce00698d), 2024-01-01
Supplement: d4ce00698d1.pdf [file d4ce00698d1.pdf]

Supporting Information

## Amine Oxide Surfactant-Mediated Synthesis of Plate-based Gold Nanocrystals with Tunable Surface Wrinkles and Their Applications in Ethylene Glycol Oxidation Reaction

Quanlin Wu,<sup>a</sup> Haoyu Sun,<sup>b</sup> Yuanyuan Min,<sup>b</sup> Lixin Wang,<sup>a</sup> Zihui Wang,<sup>a</sup> Yingying Wang,<sup>c\*</sup>

Yan Zhao,<sup>d</sup> and Yiqun Zheng<sup>b\*</sup>

<sup>a</sup> School of Resource & Environment and Safety Engineering, Jining University, Qufu, Shandong 273155, China

<sup>b</sup> School of Chemistry, Chemical Engineering, and Materials, Jining University, Qufu, Shandong 273155, China

<sup>c</sup> Health Management Department, Shandong Vocational College of Light Industry, Zibo, Shandong 255300, China

<sup>d</sup> College of Chemistry and Chemical Engineering, Qufu Normal University, Qufu, Shandong 273165, China

\* Corresponding authors: Prof. Dr. Y. Zheng, E-mail: [yzheng@jnxu.edu.cn](mailto:yzheng@jnxu.edu.cn); Prof. Dr. Y.-Y. Wang, [hxywy2005@mail.sdu.edu.cn](mailto:hxywy2005@mail.sdu.edu.cn).

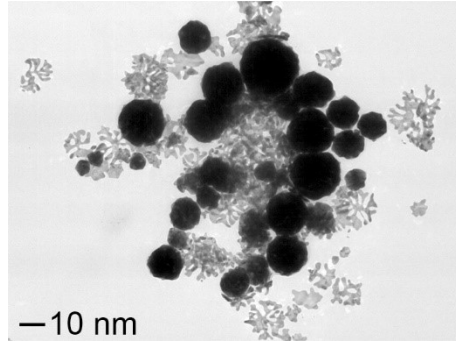

**Figure S1.** TEM image of Au nanocrystals obtained *via* the standard procedure, except that no OTAC was added.

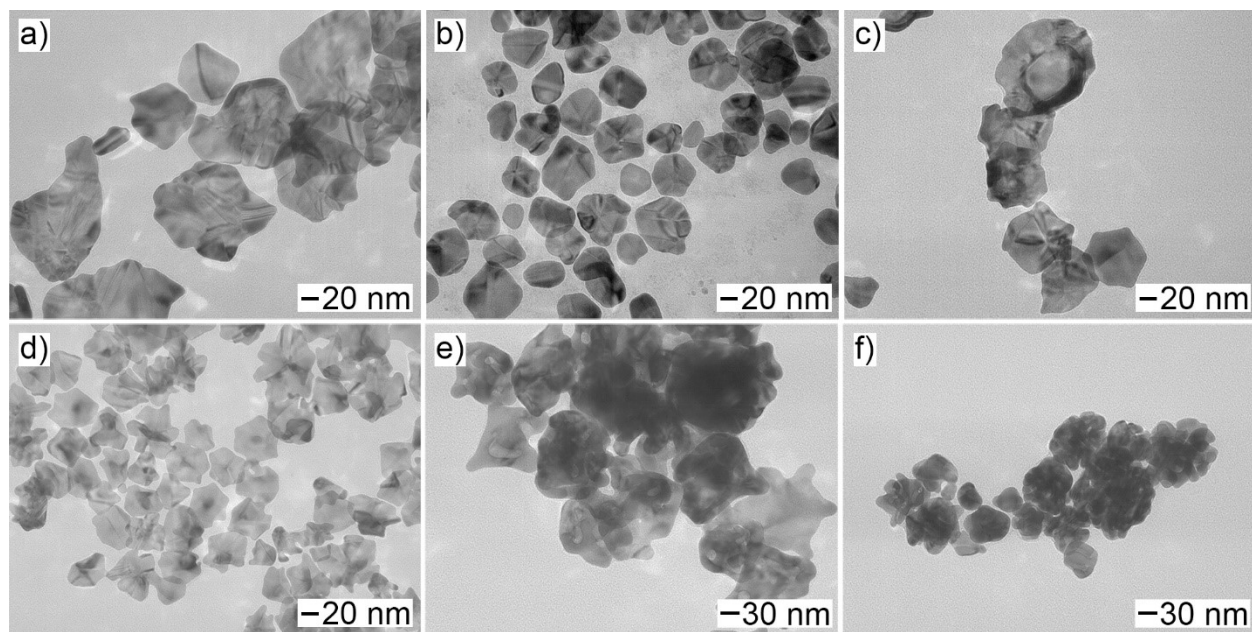

**Figure S2.** TEM images of Au nanocrystals obtained *via* the standard procedure, except that the LAO was replaced by LDAO (200 mM) with the volume set to a) 0.01 mL; b) 0.05 mL; c) 0.1 mL; d) 0.25 mL; e) 0.5 mL; f) 1 mL, respectively.

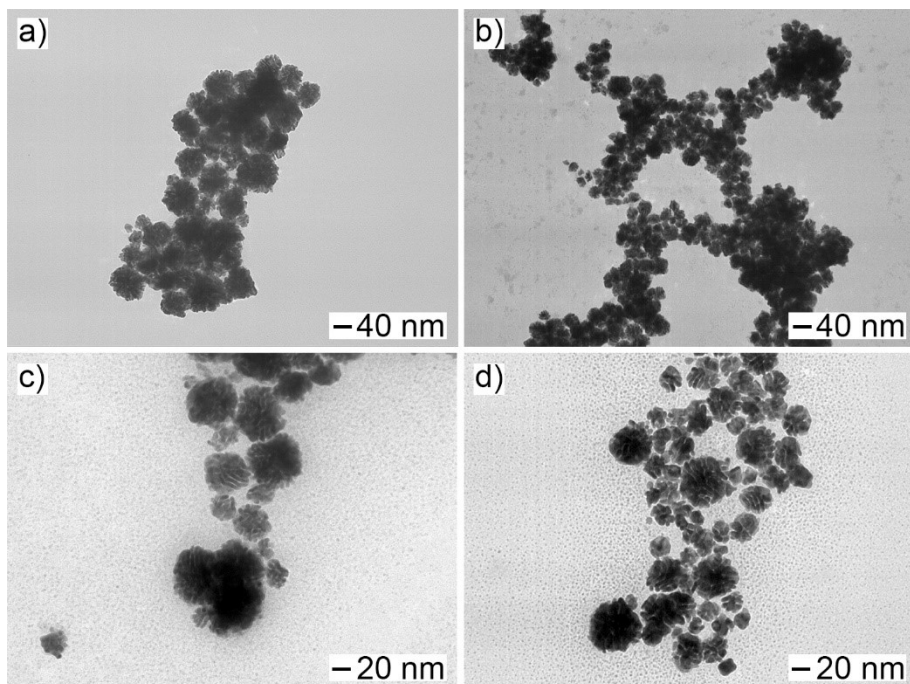

**Figure S3.** TEM image of Au nanocrystals obtained via the standard procedure, except that except that the LAO was replaced by LDAO (1.3 M) with the volume set to: a) 0.25 mL, b) 1 mL, c) 2 mL, and d) 5 mL, respectively.

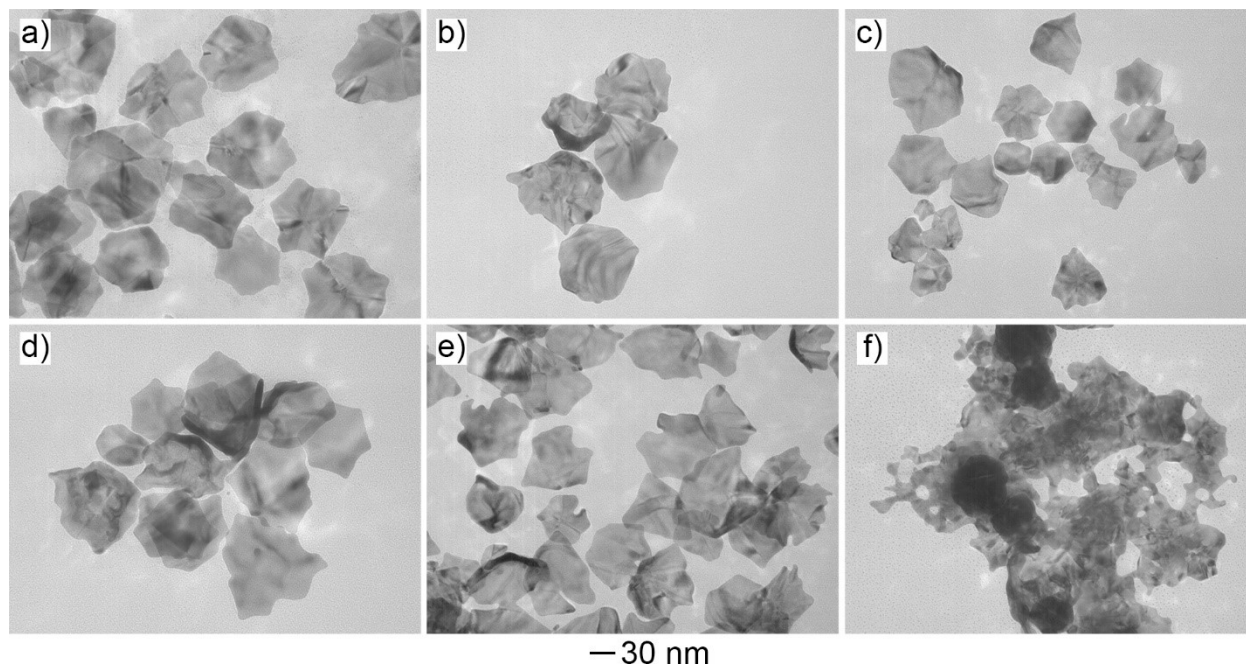

**Figure S4.** TEM images of Au nanocrystals obtained via the standard procedure, except that the LAO was replaced by  $C_{12-18}DAO$  as follows: a) 200 mM, 0.02 mL; b) 200 mM, 0.1 mL; c) 200 mM, 0.25 mL; d) 200 mM, 0.5 mL; e) 200 mM, 1 mL; f) 20%wt, 5 mL, respectively.

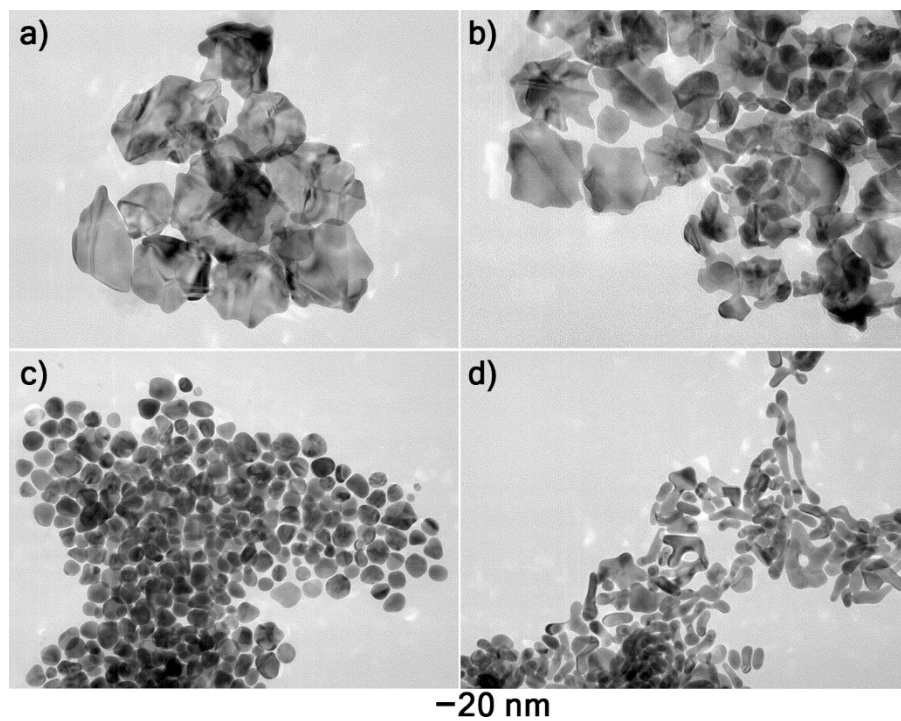

**Figure S5.** TEM images of products obtained *via* the standard procedure, except that the co-surfactant LAO was replaced by a) bis-(2-hydroxyethyl)-tallowamine oxide, b) N-(cocoalkyl)-dimethylamine oxide, c) N-9-octadecenylpropane-1,3-diamine, and d) decylamine, respectively.

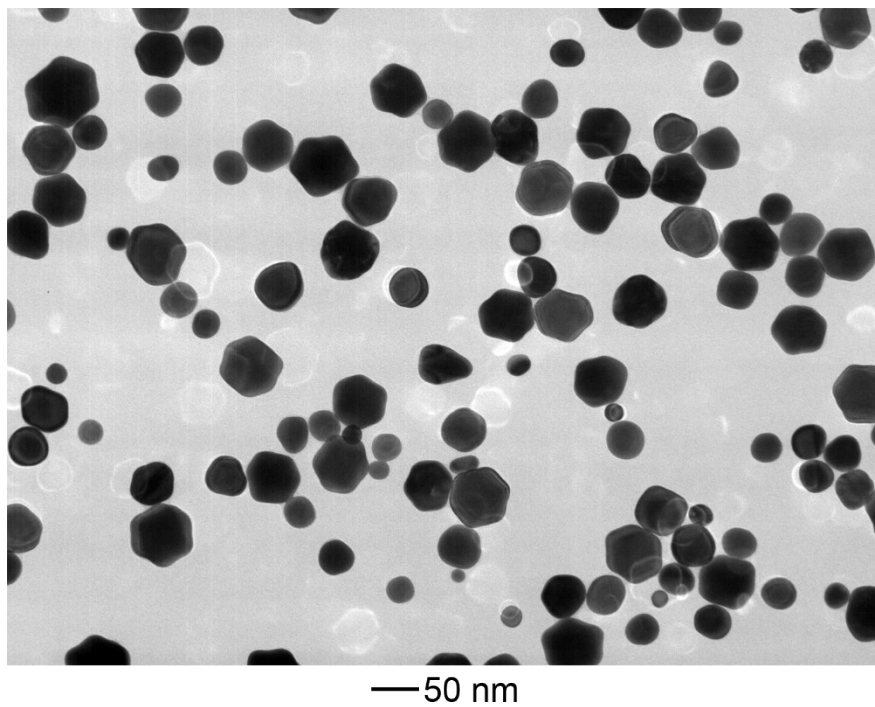

**Figure S6.** TEM image of quasi-spherical Au nanocrystals. They were prepared by heating the aqueous mixture of OTAC (20 mM, 5 mL), HAuCl<sub>4</sub> (1 mM, 6 mL), and AA (10 mM, 2 mL) at 60 °C for 1 h and collected via centrifugation.

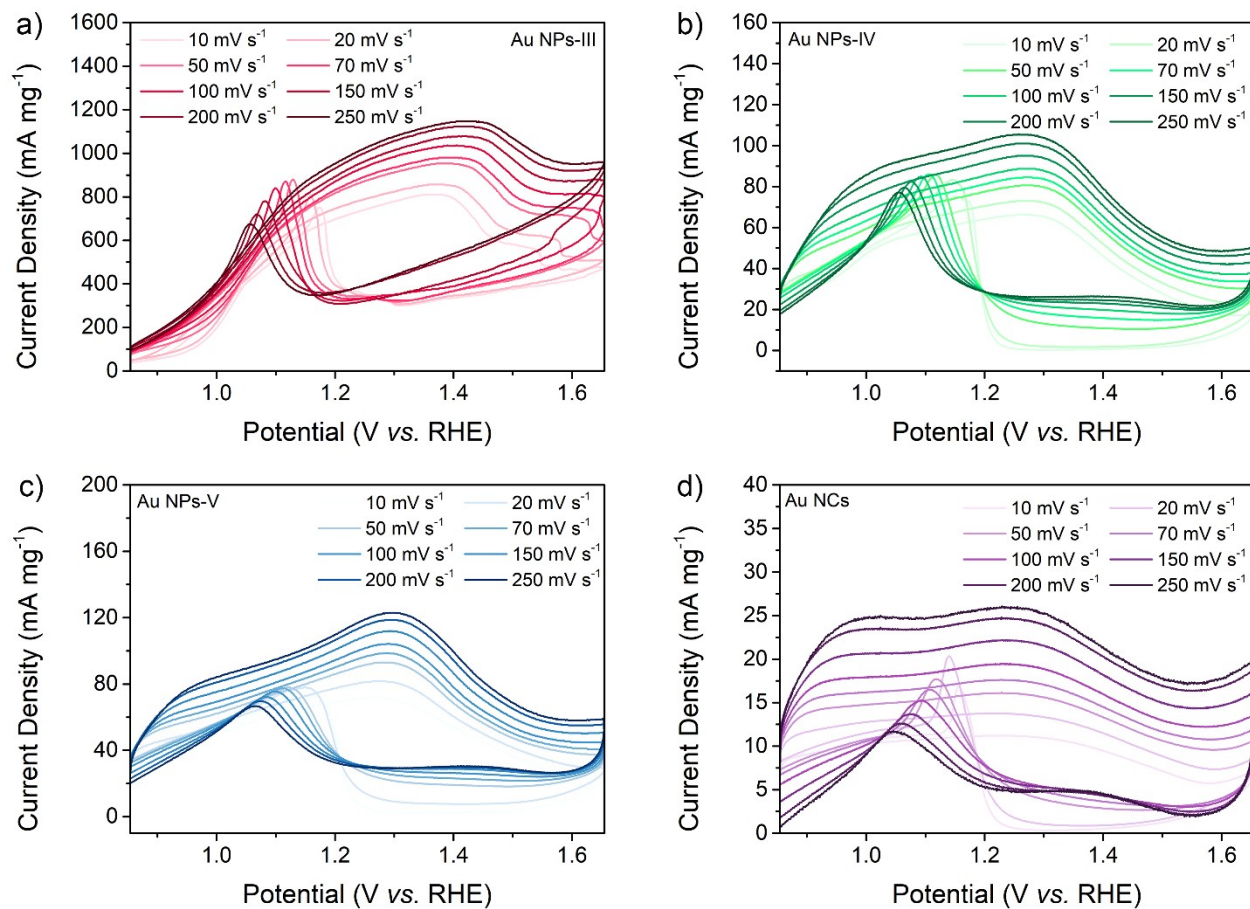

**Figure S7.** CV curves collected in 1 M KOH+1 M ethylene glycol under different scan rates.

Electrocatalysts: a) Au NPs-III; b) Au NPs-IV; c) Au NPs-V; d) Au NCs.



**Table S1.** Summary of EGOR performances of Au NPs/C and Au NCs electrocatalysts in the present study.

| Electrocatalyst | $E_s$<br>(mV) | $E_p$<br>(mV) | Mass<br>Activity<br>(mA mg <sup>-1</sup> ) | ECSA<br>(m <sup>2</sup> g <sup>-1</sup> ) | $i_r/i_f$ | SA<br>(mA cm <sup>-2</sup> ) | $i$ (t=3000s)<br>(mA mg <sup>-1</sup> ) |
|-----------------|---------------|---------------|--------------------------------------------|-------------------------------------------|-----------|------------------------------|-----------------------------------------|
| Au NPs-III/C    | 898.8         | 1385.2        | 956.4                                      | 16.5                                      | 1.1       | 5.79                         | 343                                     |
| Au NPs-IV/C     | 947.6         | 1271.0        | 82.5                                       | 7.9                                       | 1.2       | 1.05                         | 4.70                                    |
| Au NPs-V/C      | 976.3         | 1238.9        | 96.6                                       | 14                                        | 0.92      | 0.69                         | 12.3                                    |
| Au NCs/C        | 1021          | 1223.1        | 16.1                                       | 4.4                                       | 0.91      | 0.37                         | 0.30                                    |

**Table S2.** Comparison of typical Au-based EGOR electrocatalysts in alkaline electrolyte.

| <b>Electrocatalyst</b>          | <b>Mass Activity (mA mg<sub>Au</sub><sup>-1</sup>)</b> | <b>Reference</b> |
|---------------------------------|--------------------------------------------------------|------------------|
| Au NPs-III                      | 956.4                                                  | This work        |
| Au NPs-IV                       | 82.5                                                   |                  |
| Au NPs-V                        | 96.6                                                   |                  |
| Au NCs                          | 16.1                                                   |                  |
| Au nanospheres                  | 862                                                    | 1                |
| Au nanocrystals                 | 140                                                    | 2                |
| Core-shell AuPd@Pd nanocrystals | 535.4                                                  |                  |
| Au nanocrystals                 | 929.1                                                  | 3                |

## References

1. H. Xu, J. Wang, B. Yan, K. Zhang, S. Li, C. Wang, Y. Shiraishi, Y. Du and P. Yang, *Nanoscale*, 2017, **9**, 12996-13003.
2. Q. Liu, Y.-R. Xu, A.-J. Wang and J.-J. Feng, *Int. J. Hydrogen Energy*, 2016, **41**, 2547-2553.
3. H. Xu, B. Yan, K. Zhang, J. Wang, S. Li, C. Wang, Z. Xiong, Y. Shiraishi, Y. Du and P. Yang, *ACS Sustain. Chem. Eng.*, 2017, **5**, 10490-10498.
